# Supplementary material for: MiMeNet: Exploring microbiome-metabolome relationships using neural networks
Source: PLoS Comput Biol. 2021 May 17;17(5):e1009021. doi: 10.1371/journal.pcbi.1009021 (PMC8158931; doi:10.1371/journal.pcbi.1009021)
Supplement: S2 Table — Benchmarking results using MiMeNet, RF, Multivariate Elastic Net, and CCA of the three datasets using 10 iterations of 10-fold cross-validation. Mean and standard deviation values for SCC, PCC, and MAE are shown. All data are transformed using relative abundance. (XLSX) [file pcbi.1009021.s011.xlsx]

## Sheet: Sheet1
		MiMeNet	MelonnPan	RF	Elastic Net	CCA (k=10)	CCA (k=20)	CCA (k=40)
IBD	SCC	0.27 ± 0.01	0.11 ± 0.01	0.24 ± 0.01	0.18 ± 0.01	0.02 ± 0.03	0.03 ± 0.02	0.04 ± 0.02
	PCC	0.18 ± 0.01	0.06 ± 0.01	0.16 ± 0.01	0.12 ± 0.01	0.01 ± 0.02	0.01 ± 0.02	0.01 ± 0.02
	MAE	5.03 x 10-4 ± 4.2 x10-8	1.51 x 10-3 ± 1.26 x 10-4	4.042 x 10-4 ± 2.65 x10-6	0.002 ± 7.75 x 10-6	6.51 x 10-4 ± 3.03 x 10-5	8.35 x 10-4 ± 3.45 x 10-5	8.12 x 10-4 ± 3.45 x 10-5
Cystic Fibrosis	SCC	0.32 ± 0.01	0.28 ± 0.01	0.43 ± 0.01	0.31 ± 0.01	0.08 ± 0.01	0.14 ± 0.01	0.19 ± 0.01
	PCC	0.26 ± 0.06	0.30 ± 0.01	0.47 ± 0.02	0.35 ± 0.01	0.01 ± 0.01	0.02 ± 0.01	0.01 ± 0.01
	MAE	0.006 ± 1.65 x 10-6	0.005 ± 3.5 x10-5	0.005 ± 0.03	0.006 ± 8.62 x 10-5	0.03 ± 0.010	0.067 ± 0.013	0.116 ± 0.013
Soil	SCC	0.14 ± 0.05	-0.27 ± 0.04	0.19 ± 0.06	0.29 ± 0.01	0.33 ± 0.02	-	-
	PCC	0.07 ± 0.05	-0.27 ± 0.03	0.11 ± 0.04	0.22 ± 0.01	0.18 ± 0.04	-	-
	MAE	0.008 ± 2.00 x 10-4	0.006 ± 1.06 x 10-4	0.006 ± 3.71 x 10-4	0.011 ± 0.009	0.021 ± 0.002	-	-
